# Supplementary material for: Efficient selective and atom economic catalytic conversion of glycerol to lactic acid
Source: Springer Nature journal article supplement (doi:10.1038/ncomms6084), 2014-10-03
Supplement: 41467_2014_BFncomms6084_MOESM3_ESM.mol [file 41467_2014_BFncomms6084_MOESM3_ESM.mol]

  ChemDraw09221408242D

 24 20  0  0  0  0  0  0  0  0999 V2000
   -0.3685   -1.4811    0.0000 C   0  0  0  0  0  0  0  0  0  0  0  0
   -0.3685   -2.3061    0.0000 N   0  0  0  0  0  0  0  0  0  0  0  0
    0.4161   -2.5611    0.0000 C   0  0  0  0  0  0  0  0  0  0  0  0
    0.9010   -1.8936    0.0000 C   0  0  0  0  0  0  0  0  0  0  0  0
    0.4161   -1.2262    0.0000 N   0  0  0  0  0  0  0  0  0  0  0  0
   -1.0359   -2.7911    0.0000 C   0  0  0  0  0  0  0  0  0  0  0  0
    0.6711   -0.4416    0.0000 C   0  0  0  0  0  0  0  0  0  0  0  0
   -0.4796    0.8766    0.0000 C   0  0  0  0  0  0  0  0  0  0  0  0
    0.3337    0.7386    0.0000 N   0  0  0  0  0  0  0  0  0  0  0  0
    0.7163    1.4695    0.0000 C   0  0  0  0  0  0  0  0  0  0  0  0
    0.1394    2.0592    0.0000 C   0  0  0  0  0  0  0  0  0  0  0  0
   -0.5998    1.6928    0.0000 N   0  0  0  0  0  0  0  0  0  0  0  0
    0.7002   -0.0006    0.0000 C   0  0  0  0  0  0  0  0  0  0  0  0
   -1.3307    2.0753    0.0000 C   0  0  0  0  0  0  0  0  0  0  0  0
   -3.1083    0.5687    0.0000 C   0  5  0  0  0  0  0  0  0  0  0  0
   -3.8344    1.0047    0.0000 O   0  3  0  0  0  0  0  0  0  0  0  0
    3.0122    1.9688    0.0000 B   0  5  0  0  0  0  0  0  0  0  0  0
    3.8344    1.9688    0.0000 F   0  0  0  0  0  0  0  0  0  0  0  0
    3.0122    2.7911    0.0000 F   0  0  0  0  0  0  0  0  0  0  0  0
    2.1900    1.9688    0.0000 F   0  0  0  0  0  0  0  0  0  0  0  0
    3.0122    1.1466    0.0000 F   0  0  0  0  0  0  0  0  0  0  0  0
   -3.1404   -0.9010    0.0000 C   0  5  0  0  0  0  0  0  0  0  0  0
   -3.8137   -1.3808    0.0000 O   0  3  0  0  0  0  0  0  0  0  0  0
   -1.7293   -0.1613    0.0000 Ir  0  3  0  0  0  0  0  0  0  0  0  0
  1  2  1  0      
  2  3  1  0      
  3  4  2  0      
  4  5  1  0      
  5  1  1  0      
  2  6  1  0      
  5  7  1  0      
  8  9  1  0      
  9 10  1  0      
 10 11  2  0      
 11 12  1  0      
 12  8  1  0      
  9 13  1  0      
 12 14  1  0      
 15 16  3  0      
 17 21  1  0      
 17 20  1  0      
 17 19  1  0      
 17 18  1  0      
 22 23  3  0      
M  RAD  2   1   1   8   1
M  CHG  6  15  -1  16   1  17  -1  22  -1  23   1  24   1
M  END
