# Supplementary material for: Efficient selective and atom economic catalytic conversion of glycerol to lactic acid
Source: Springer Nature journal article supplement (doi:10.1038/ncomms6084), 2014-10-03
Supplement: 41467_2014_BFncomms6084_MOESM5_ESM.mol [file 41467_2014_BFncomms6084_MOESM5_ESM.mol]

  ChemDraw09221408242D

 48 42  0  0  0  0  0  0  0  0999 V2000
    1.8479    1.8559    0.0000 C   0  0  0  0  0  0  0  0  0  0  0  0
    1.2168    2.3873    0.0000 N   0  0  0  0  0  0  0  0  0  0  0  0
    1.5271    3.1517    0.0000 C   0  0  0  0  0  0  0  0  0  0  0  0
    2.3500    3.0928    0.0000 C   0  0  0  0  0  0  0  0  0  0  0  0
    2.5483    2.2919    0.0000 N   0  0  0  0  0  0  0  0  0  0  0  0
    0.4160    2.1891    0.0000 C   0  0  0  0  0  0  0  0  0  0  0  0
    3.3127    1.9816    0.0000 C   0  0  0  0  0  0  0  0  0  0  0  0
   -1.4306    1.7987    0.0000 C   0  0  0  0  0  0  0  0  0  0  0  0
   -0.7995    2.3301    0.0000 N   0  0  0  0  0  0  0  0  0  0  0  0
   -1.1099    3.0945    0.0000 C   0  0  0  0  0  0  0  0  0  0  0  0
   -1.9328    3.0355    0.0000 C   0  0  0  0  0  0  0  0  0  0  0  0
   -2.1310    2.2347    0.0000 N   0  0  0  0  0  0  0  0  0  0  0  0
    0.0013    2.1318    0.0000 C   0  0  0  0  0  0  0  0  0  0  0  0
   -2.8954    1.9244    0.0000 C   0  0  0  0  0  0  0  0  0  0  0  0
   -2.9592    0.2233    0.0000 C   0  0  0  0  0  0  0  0  0  0  0  0
   -3.2763    0.9849    0.0000 N   0  0  0  0  0  0  0  0  0  0  0  0
   -4.0986    0.9186    0.0000 C   0  0  0  0  0  0  0  0  0  0  0  0
   -4.2897    0.1161    0.0000 C   0  0  0  0  0  0  0  0  0  0  0  0
   -3.5855   -0.3137    0.0000 N   0  0  0  0  0  0  0  0  0  0  0  0
   -2.8465    1.6891    0.0000 C   0  0  0  0  0  0  0  0  0  0  0  0
   -3.5193   -1.1360    0.0000 C   0  0  0  0  0  0  0  0  0  0  0  0
   -2.5634   -0.7433    0.0000 H   0  5  0  0  0  0  0  0  0  0  0  0
   -1.4498   -1.8239    0.0000 C   0  0  0  0  0  0  0  0  0  0  0  0
   -2.1319   -2.2879    0.0000 N   0  0  0  0  0  0  0  0  0  0  0  0
   -1.9013   -3.0801    0.0000 C   0  0  0  0  0  0  0  0  0  0  0  0
   -1.0767   -3.1055    0.0000 C   0  0  0  0  0  0  0  0  0  0  0  0
   -0.7977   -2.3292    0.0000 N   0  0  0  0  0  0  0  0  0  0  0  0
   -2.9083   -2.0089    0.0000 C   0  0  0  0  0  0  0  0  0  0  0  0
   -0.0056   -2.0986    0.0000 C   0  0  0  0  0  0  0  0  0  0  0  0
   -1.4197   -0.1305    0.0000 Ir  0  1  0  0  0  0  0  0  0  0  0  0
    0.2173    0.8163    0.0000 H   0  5  0  0  0  0  0  0  0  0  0  0
    2.9766   -0.6118    0.0000 C   0  0  0  0  0  0  0  0  0  0  0  0
    3.7204   -0.2548    0.0000 N   0  0  0  0  0  0  0  0  0  0  0  0
    4.2897   -0.8518    0.0000 C   0  0  0  0  0  0  0  0  0  0  0  0
    3.8979   -1.5778    0.0000 C   0  0  0  0  0  0  0  0  0  0  0  0
    3.0863   -1.4295    0.0000 N   0  0  0  0  0  0  0  0  0  0  0  0
    3.8687    0.5568    0.0000 C   0  0  0  0  0  0  0  0  0  0  0  0
    2.4893   -1.9989    0.0000 C   0  0  0  0  0  0  0  0  0  0  0  0
    1.8922   -1.8740    0.0000 C   0  0  0  0  0  0  0  0  0  0  0  0
    2.5496   -2.3724    0.0000 N   0  0  0  0  0  0  0  0  0  0  0  0
    2.2788   -3.1517    0.0000 C   0  0  0  0  0  0  0  0  0  0  0  0
    1.4540   -3.1350    0.0000 C   0  0  0  0  0  0  0  0  0  0  0  0
    1.2150   -2.3453    0.0000 N   0  0  0  0  0  0  0  0  0  0  0  0
    3.3393   -2.1334    0.0000 C   0  0  0  0  0  0  0  0  0  0  0  0
    0.4357   -2.0745    0.0000 C   0  0  0  0  0  0  0  0  0  0  0  0
    2.7671    0.8076    0.0000 H   0  5  0  0  0  0  0  0  0  0  0  0
    1.8369   -0.0732    0.0000 Ir  0  1  0  0  0  0  0  0  0  0  0  0
    0.2086   -0.8710    0.0000 H   0  5  0  0  0  0  0  0  0  0  0  0
  1  2  1  0      
  2  3  1  0      
  3  4  2  0      
  4  5  1  0      
  5  1  1  0      
  2  6  1  0      
  5  7  1  0      
  8  9  1  0      
  9 10  1  0      
 10 11  2  0      
 11 12  1  0      
 12  8  1  0      
  9 13  1  0      
 12 14  1  0      
 15 16  1  0      
 16 17  1  0      
 17 18  2  0      
 18 19  1  0      
 19 15  1  0      
 16 20  1  0      
 19 21  1  0      
 23 24  1  0      
 24 25  1  0      
 25 26  2  0      
 26 27  1  0      
 27 23  1  0      
 24 28  1  0      
 27 29  1  0      
 32 33  1  0      
 33 34  1  0      
 34 35  2  0      
 35 36  1  0      
 36 32  1  0      
 33 37  1  0      
 36 38  1  0      
 39 40  1  0      
 40 41  1  0      
 41 42  2  0      
 42 43  1  0      
 43 39  1  0      
 40 44  1  0      
 43 45  1  0      
M  RAD  6   1   1   8   1  15   1  23   1  32   1  39   1
M  CHG  6  22  -1  30   3  31  -1  46  -1  47   3  48  -1
M  END
