# Supplementary material for: Efficient selective and atom economic catalytic conversion of glycerol to lactic acid
Source: Springer Nature journal article supplement (doi:10.1038/ncomms6084), 2014-10-03
Supplement: 41467_2014_BFncomms6084_MOESM7_ESM.mol [file 41467_2014_BFncomms6084_MOESM7_ESM.mol]

  ChemDraw09221408242D

 26 22  0  0  0  0  0  0  0  0999 V2000
    0.4583    1.6968    0.0000 C   0  0  0  0  0  0  0  0  0  0  0  0
    1.0894    2.2282    0.0000 N   0  0  0  0  0  0  0  0  0  0  0  0
    0.7791    2.9926    0.0000 C   0  0  0  0  0  0  0  0  0  0  0  0
   -0.0438    2.9336    0.0000 C   0  0  0  0  0  0  0  0  0  0  0  0
   -0.2421    2.1328    0.0000 N   0  0  0  0  0  0  0  0  0  0  0  0
    1.8902    2.0299    0.0000 C   0  0  0  0  0  0  0  0  0  0  0  0
   -1.0065    1.8225    0.0000 C   0  0  0  0  0  0  0  0  0  0  0  0
   -1.0702    0.1214    0.0000 C   0  0  0  0  0  0  0  0  0  0  0  0
   -1.3873    0.8830    0.0000 N   0  0  0  0  0  0  0  0  0  0  0  0
   -2.2097    0.8167    0.0000 C   0  0  0  0  0  0  0  0  0  0  0  0
   -2.4008    0.0142    0.0000 C   0  0  0  0  0  0  0  0  0  0  0  0
   -1.6966   -0.4156    0.0000 N   0  0  0  0  0  0  0  0  0  0  0  0
   -0.9576    1.5872    0.0000 C   0  0  0  0  0  0  0  0  0  0  0  0
   -1.6304   -1.2379    0.0000 C   0  0  0  0  0  0  0  0  0  0  0  0
    0.4821   -1.7109    0.0000 C   0  0  0  0  0  0  0  0  0  0  0  0
   -0.2000   -2.1750    0.0000 N   0  0  0  0  0  0  0  0  0  0  0  0
    0.0306   -2.9671    0.0000 C   0  0  0  0  0  0  0  0  0  0  0  0
    0.8552   -2.9926    0.0000 C   0  0  0  0  0  0  0  0  0  0  0  0
    1.1342   -2.2162    0.0000 N   0  0  0  0  0  0  0  0  0  0  0  0
   -0.9764   -1.8959    0.0000 C   0  0  0  0  0  0  0  0  0  0  0  0
    1.9263   -1.9856    0.0000 C   0  0  0  0  0  0  0  0  0  0  0  0
    1.6389    0.2694    0.0000 C   0  5  0  0  0  0  0  0  0  0  0  0
    2.4008    0.6673    0.0000 O   0  3  0  0  0  0  0  0  0  0  0  0
   -0.5222   -0.9741    0.0000 H   0  5  0  0  0  0  0  0  0  0  0  0
    1.5053   -0.8597    0.0000 H   0  5  0  0  0  0  0  0  0  0  0  0
    0.4693   -0.2324    0.0000 Ir  0  1  0  0  0  0  0  0  0  0  0  0
  1  2  1  0      
  2  3  1  0      
  3  4  2  0      
  4  5  1  0      
  5  1  1  0      
  2  6  1  0      
  5  7  1  0      
  8  9  1  0      
  9 10  1  0      
 10 11  2  0      
 11 12  1  0      
 12  8  1  0      
  9 13  1  0      
 12 14  1  0      
 15 16  1  0      
 16 17  1  0      
 17 18  2  0      
 18 19  1  0      
 19 15  1  0      
 16 20  1  0      
 19 21  1  0      
 22 23  3  0      
M  RAD  3   1   1   8   1  15   1
M  CHG  5  22  -1  23   1  24  -1  25  -1  26   3
M  END
